# Supplementary material for: Quality and Safety of Fresh Chicken Fillets after High Pressure Processing: Survival of Indigenous Brochothrix thermosphacta and Inoculated Listeria monocytogenes
Source: PubMed Central journal article supplement (PMC6921100; doi:10.3390/microorganisms7110520), 2019-11-02
Supplement: microorganisms-07-00520-s001.pdf [file microorganisms-07-00520-s001.pdf]

Table S1: Identity of *Brochothrix* isolates after sequencing the V1-V3 variable region of 16S rRNA gene.

| Isolate | Closest Relative                 | Identity | Accession no. of closest relative |
|---------|----------------------------------|----------|-----------------------------------|
| BC9     | <i>Brochothrix thermosphacta</i> | 99%      | AY543017                          |
| BC28    | <i>Brochothrix thermosphacta</i> | 99%      | AY543017                          |
| BP1     | <i>Brochothrix thermosphacta</i> | 99%      | AY543017                          |
| BP2     | <i>Brochothrix thermosphacta</i> | 100%     | CP023483                          |
| BP12    | <i>Brochothrix thermosphacta</i> | 99%      | CP023483                          |
| BTC2    | <i>Brochothrix thermosphacta</i> | 100%     | AY543017                          |
| BTC12   | <i>Brochothrix thermosphacta</i> | 100%     | CP023643                          |
| BTC47   | <i>Brochothrix thermosphacta</i> | 100%     | AY543022                          |
| BTP14   | <i>Brochothrix thermosphacta</i> | 99%      | CP023483                          |
| BTP18   | <i>Brochothrix thermosphacta</i> | 99%      | AY543017                          |

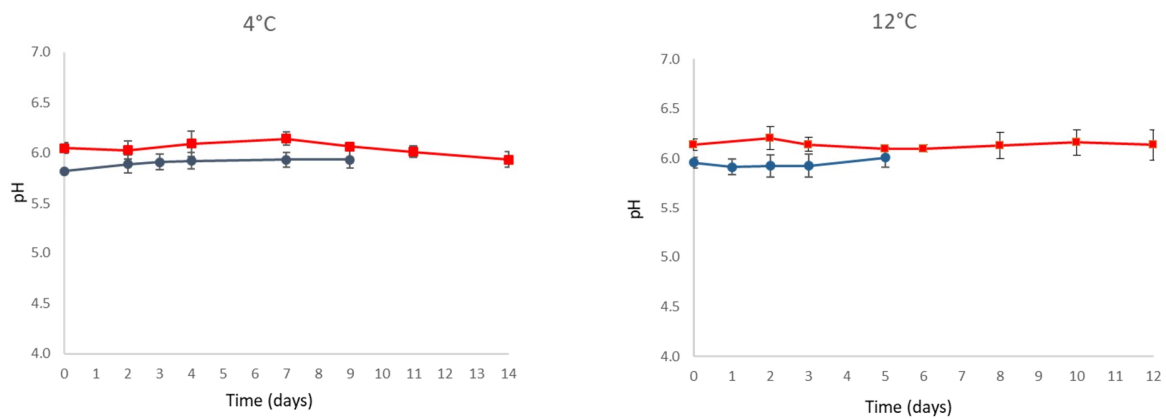

**Figure S1:** Changes in the pH values during storage of chicken fillets untreated (●) or HPP-treated (500MPa/10min) (■) during storage under vacuum packaging at 4°C (right) and at 12°C (left). Error bars represent mean values  $\pm$  standard deviation.
